# Supplementary material for: Oxidation of anticancer Pt(ii) complexes with monodentate phosphane ligands: towards stable but active Pt(iv) prodrugs
Source: Royal Society of Chemistry journal article supplement (doi:10.1039/c3cc38416k), 2013-01-01
Supplement: c3cc38416k.pdf [file c3cc38416k.pdf]

## **Synthesis and anticancer activity of stable Pt(IV) monodentate phosphine complexes from their Pt(II) anticancer precursors.**

*M. Ángeles Medrano , Amparo Álvarez-Valdés, Josefina Perles, Julio Lloret, Sandra Muñoz-Galván, Amancio Carnero, Carmen Navarro-Ranninger , Adoración G. Quiroga\**

**A) Full characterization and detailed synthesis of the complexes**

**B) Supplementary information of the reduction potential studies**

**C) Supplementary information for the protocols and cell lines**

**D) Supplementary information of the X-Ray characterization**

**E) Supplementary information of the pBR322 binding studies and conditions.**

**F) supplementary information of the reaction of complex 1 and GSH**

### A) Full characterization and detailed synthesis of the complexes

Freshly synthesized Chlorine gas was bubble through a solution of *trans*-PtCl<sub>2</sub>(PPh<sub>3</sub>)(amine) in CH<sub>2</sub>Cl<sub>2</sub> for 1 hour to give a crystalline intense yellow solid.

***t*-PtCl<sub>4</sub>(PPh<sub>3</sub>)(NH(CH<sub>3</sub>)<sub>2</sub>) (1)**: Yellow solid. Yield: 64%. Elemental analysis CHN, found: C,36.71; H,3.78; N,2.37; calculated for C<sub>20</sub>H<sub>22</sub>Cl<sub>4</sub>NPt : C,37.28; H,3.44; N,2.17. NMR δ<sub>H</sub> (300.13MHz; CDCl<sub>3</sub>) 2.70(6H, sept CH<sub>3</sub>-dma), 4.34(1H, br, NH), 7.41(6H, m, C<sub>meta</sub>), 7.50(3H, m, C<sub>para</sub>), 7.94(6H, m, C<sub>orto</sub>). δ<sub>C</sub> (75.47MHz; CDCl<sub>3</sub>), 41.23(CH<sub>3</sub>-dma), 127.6(CH-Ar), 132.1(CH-Ar), 138.5(CH-Ar). δ<sub>P</sub> (121,5MHz; CDCl<sub>3</sub>), 2.11(*J*<sub>P-Pt</sub> 2121,15). δ<sub>Pt</sub> (64.53MHz; CDCl<sub>3</sub>) -1545 (*J*<sub>Pt-P</sub> 2122.32).

***t*-PtCl<sub>4</sub>(PPh<sub>3</sub>)(NH<sub>2</sub>CH(CH<sub>3</sub>)<sub>2</sub>) (2)**: Yellow solid. Yield: 52%. Elemental analysis CHN, found: C,38.26; H,4.02; N,2.07; calculated for C<sub>21</sub>H<sub>24</sub>Cl<sub>4</sub>NPt : C,38.32; H,3.67; N,2.13. NMR δ<sub>H</sub> (300.13MHz; (Acetona D<sub>6</sub>) 1.43(6H, d, *J*<sub>H-H</sub> 5.6, CH<sub>3</sub>-dma), 3.72(1H, sept, CH-ipa), 4.73(1H, br, NH), 7.49(6H, m, C<sub>meta</sub>), 7.56(3H, m, C<sub>para</sub>), 7.61(6H, m, C<sub>orto</sub>). δ<sub>C</sub> (75.47 MHz; Acetona D<sub>6</sub>), 23.4(CH<sub>3</sub>-ipa), 127.5(CH-Ar), 131.9(CH-Ar), 135.7(CH-Ar). δ<sub>P</sub> (121,5MHz; Acetona D<sub>6</sub>), 0.79(*J*<sub>P-Pt</sub> 2158,17). δ<sub>Pt</sub> (64.53MHz; Acetona D<sub>6</sub>) -1496 (*J*<sub>Pt-P</sub> 2159.43).

## B) Supplementary information of the reduction potential studies

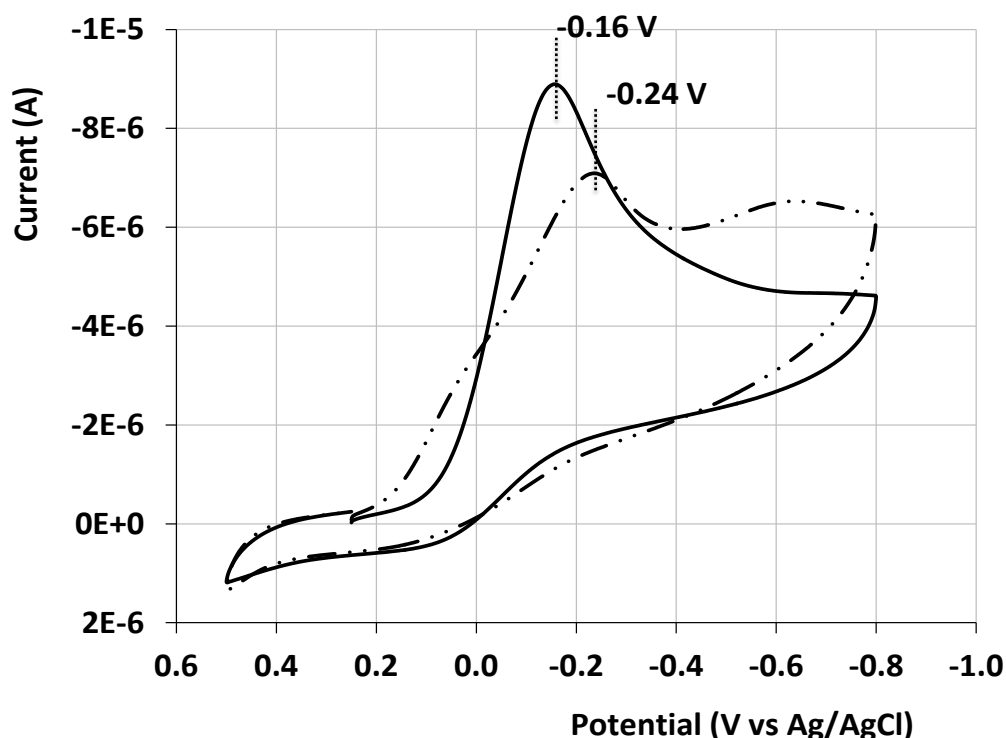

Figure SM1. Cyclic voltammograms of 3 mM complex **2** (solid line) and complex **1** (dash dotted line) in a 0.1 M of NaClO<sub>4</sub> water:DMSO (1:2) solution at a carbon disc electrode and scan rate of 100 mV·s<sup>-1</sup>.

### Experimental part

The reduction potentials have been examined for *trans*-Pt<sup>IV</sup> complexes **1** and **2**. The electrochemical study of Pt<sup>IV</sup> analogues of cisplatin has been also included to control.

Generally, cyclic voltammetry (CV) is used for measuring the reduction potential (E<sub>p</sub>) of Pt<sup>IV</sup> complexes. The reduction of Pt<sup>IV</sup> is an irreversible two electron process involving the loss of axial ligands and a return to square-planar geometry of Pt<sup>II</sup>. The reported E<sub>p</sub> values are cathodic half-wave potentials and are measured at the peak of the forward wave. The CV obtained for **1** and **2** complexes are shown in Figure SM1. The reduction potentials of all Pt<sup>IV</sup> complexes are given in the manuscript.

## C) Supplementary information for the protocols and cell lines

**Cell lines.** C A375 human metastatic melanoma and NCI-H460 lung cancer cell lines were purchased from ATCC. Colorectal carcinoma cell lines HCT116, and

matched p53-deficient HCT116 (-/-) were a kind gift of Bert Vogelstein (John-Hopkins University, Baltimore, MD). These cell lines were cultured with DMEN (A375 and NCI-H460) or RPMI (HCT116) (Sigma) with 10% foetal bovine serum, 2mM L-glutamine, 100 U/mL penicilin, 100 µg/mL streptomycin in humidified air with 5% CO<sub>2</sub> at 37 °C.

**Assessment of Cytotoxicity.** All tests were repeated at different times as controls. The compounds were tested in 96-well plates. Cells growing in a flask were harvested just before they became confluent, counted using a haemocytometer and diluted with media adjusting the concentration to the required number of cells per 0.2 ml (volume for each well). The cells were then seeded in the 96-well plates at a density depending of the cell size, between 1000 and 4000 cells/well. The cells were then left to plate down and grow for 24 hours before adding the drugs. The compounds were weighed out, dissolved in DMSO and diluted with PBS to reach 10 mM solutions. From here a “mother plate” with serial dilutions was prepared at 200X the final concentration in the culture. Each mother plate was stored at -20 °C until further use. The appropriate volume of the compound solution (usually 2 µL) was added automatically (Beckman FX 96 tip) to media to make it up to the final concentration for each drug. The media was removed from the cells and replaced with 0.2ml of the media dosed with drug. Each concentration was assayed in triplicate. A set of control wells are left on each plate, containing media without drug. A second set of control wells were left on each plate, containing media with the same concentration of PBS. Another control set was obtained with the cells untreated just before adding the drugs (seeding control, number of cells starting the culture) The cells were exposed to the drugs for 96 hours and then washed twice with phosphate buffered saline before being fixed with 10% glutaraldehyde. Cells were washed twice and fixed with crystal violet 0.5% during 30 minutes, extensively washed and the absorbance was measured at 595 nm.

#### **D) Supplementary information of the X-Ray characterization**

##### **Experimental data complex 1**

A clear yellow prismatic-like specimen of C<sub>20</sub>H<sub>22</sub>Cl<sub>4</sub>NPPt, approximate dimensions 0.20 mm x 0.24 mm x 0.32 mm, was used for the X-ray crystallographic analysis. The frames were integrated with the Bruker SAINT software package using a narrow-frame algorithm. The integration of the data using a triclinic unit cell yielded a total of 37418 reflections to a maximum  $\theta$  angle of 28.29° (0.75 Å resolution), of which 5342 were independent (average redundancy 7.004, completeness = 99.7%,  $R_{\text{int}} = 2.40\%$ ,  $R_{\text{sig}} = 1.35\%$ ) and 5247 (98.22%) were greater than  $2\sigma(F^2)$ . The final cell constants of  $a = 8.6761(7)$  Å,  $b = 9.8525(8)$  Å,  $c = 14.2672(11)$  Å,  $\alpha = 73.172(3)^\circ$ ,  $\beta = 75.434(3)^\circ$ ,  $\gamma = 69.505(4)^\circ$ , volume = 1078.02(15) Å<sup>3</sup>, are based upon the refinement of the XYZ-centroids of 9996 reflections above  $20 \sigma(I)$  with  $5.978^\circ < 2\theta < 56.57^\circ$ . Data were corrected for absorption effects using the multi-scan method (SADABS). The ratio of minimum to maximum apparent transmission was 0.758. The calculated minimum and maximum transmission coefficients (based on crystal size) are 0.2102 and 0.3315. The structure was solved and refined using the Bruker SHELXTL Software Package, using the space group P -1, with Z = 2 for the formula unit, C<sub>20</sub>H<sub>22</sub>Cl<sub>4</sub>NPPt. The final

anisotropic full-matrix least-squares refinement on  $F^2$  with 246 variables converged at  $R1 = 1.22\%$ , for the observed data and  $wR2 = 7.77\%$  for all data. The goodness-of-fit was 1.196. The largest peak in the final difference electron density synthesis was  $1.165 \text{ e}^-/\text{\AA}^3$  and the largest hole was  $-1.644 \text{ e}^-/\text{\AA}^3$  with an RMS deviation of  $0.482 \text{ e}^-/\text{\AA}^3$ . On the basis of the final model, the calculated density was  $1.985 \text{ g/cm}^3$  and  $F(000)$ ,  $620 \text{ e}^-$ .

**Table SM4. Sample and crystal data for complex 1.**

|                        |                                                    |                            |
|------------------------|----------------------------------------------------|----------------------------|
| Chemical formula       | $\text{C}_{20}\text{H}_{22}\text{Cl}_4\text{NPPt}$ |                            |
| Formula weight         | 644.25                                             |                            |
| Temperature            | 100(2) K                                           |                            |
| Wavelength             | 0.71073 Å                                          |                            |
| Crystal size           | 0.20 x 0.24 x 0.32 mm                              |                            |
| Crystal habit          | clear yellow prismatic                             |                            |
| Crystal system         | triclinic                                          |                            |
| Space group            | P -1                                               |                            |
| Unit cell dimensions   | $a = 8.6761(7) \text{ \AA}$                        | $\alpha = 73.172(3)^\circ$ |
|                        | $b = 9.8525(8) \text{ \AA}$                        | $\beta = 75.434(3)^\circ$  |
|                        | $c = 14.2672(11) \text{ \AA}$                      | $\gamma = 69.505(4)^\circ$ |
| Volume                 | $1078.02(15) \text{ \AA}^3$                        |                            |
| Z                      | 2                                                  |                            |
| Density (calculated)   | $1.985 \text{ Mg/cm}^3$                            |                            |
| Absorption coefficient | $7.084 \text{ mm}^{-1}$                            |                            |
| $F(000)$               | 620                                                |                            |

**Table SM5. Data collection and structure refinement for 1.**

|                                     |                                                                                     |                                   |
|-------------------------------------|-------------------------------------------------------------------------------------|-----------------------------------|
| Theta range for data collection     | 1.51 to 28.29°                                                                      |                                   |
| Index ranges                        | $-11 \leq h \leq 11$ , $-13 \leq k \leq 13$ , $-19 \leq l \leq 19$                  |                                   |
| Reflections collected               | 37418                                                                               |                                   |
| Independent reflections             | 5342 [ $R(\text{int}) = 0.0240$ ]                                                   |                                   |
| Coverage of independent reflections | 99.7%                                                                               |                                   |
| Absorption correction               | multi-scan                                                                          |                                   |
| Max. and min. transmission          | 0.3315 and 0.2102                                                                   |                                   |
| Structure solution technique        | direct methods                                                                      |                                   |
| Structure solution program          | SHELXS-97 (Sheldrick, 2008)                                                         |                                   |
| Refinement method                   | Full-matrix least-squares on $F^2$                                                  |                                   |
| Refinement program                  | SHELXL-97 (Sheldrick, 2008)                                                         |                                   |
| Function minimized                  | $\sum w(F_o^2 - F_c^2)^2$                                                           |                                   |
| Data / restraints / parameters      | 5342 / 0 / 246                                                                      |                                   |
| Goodness-of-fit on $F^2$            | 1.196                                                                               |                                   |
| $\Delta/\sigma_{\text{max}}$        | 0.001                                                                               |                                   |
| Final R indices                     | $5247 \text{ data}; I > 2\sigma(I)$                                                 | $R1 = 0.0122$ ,<br>$wR2 = 0.0454$ |
|                                     | all data                                                                            | $R1 = 0.0158$ ,<br>$wR2 = 0.0777$ |
| Weighting scheme                    | $w = 1/[\sigma^2(F_o^2) + (0.0558P)^2 + 0.7680P]$<br>where $P = (F_o^2 + 2F_c^2)/3$ |                                   |
| Largest diff. peak and hole         | $1.165$ and $-1.644 \text{ e}^-/\text{\AA}^3$                                       |                                   |

R.M.S. deviation from mean 0.482 eÅ<sup>-3</sup>

**Table SM6. Selected bond lengths (Å)**

**for 1.**

|                |           |                |           |
|----------------|-----------|----------------|-----------|
| <b>Pt1-Cl1</b> | 2.3274(8) | <b>Pt1-Cl2</b> | 2.3267(9) |
| <b>Pt1-Cl3</b> | 2.3098(8) | <b>Pt1-Cl4</b> | 2.3138(8) |
| <b>Pt1-N1</b>  | 2.197(3)  | <b>Pt1-P1</b>  | 2.3429(9) |

**Experimental data complex 2**

A clear yellow prismatic-like specimen of C<sub>21</sub>H<sub>24</sub>Cl<sub>4</sub>NPt, approximate dimensions 0.10 mm x 0.19 mm x 0.22 mm, was used for the X-ray crystallographic analysis. The frames were integrated with the Bruker SAINT software package using a narrow-frame algorithm. The integration of the data using a triclinic unit cell yielded a total of 30087 reflections to a maximum  $\theta$  angle of 26.83° (0.79 Å resolution), of which 4662 were independent (average redundancy 6.454, completeness = 96.0%,  $R_{\text{int}} = 3.40\%$ ,  $R_{\text{sig}} = 2.38\%$ ) and 4337 (93.03%) were greater than  $2\sigma(F^2)$ . The final cell constants of  $a = 9.0349(8)$  Å,  $b = 9.8658(9)$  Å,  $c = 14.1981(13)$  Å,  $\alpha = 72.771(5)^\circ$ ,  $\beta = 75.680(4)^\circ$ ,  $\gamma = 71.733(4)^\circ$ , volume = 1131.09(18) Å<sup>3</sup>, are based upon the refinement of the XYZ-centroids of 9880 reflections above  $20 \sigma(I)$  with  $5.244^\circ < 2\theta < 53.04^\circ$ . Data were corrected for absorption effects using the multi-scan method (SADABS). The ratio of minimum to maximum apparent transmission was 0.732. The calculated minimum and maximum transmission coefficients (based on crystal size) are 0.3181 and 0.5516. The structure was solved and refined using the Bruker SHELXTL Software Package, using the space group P -1, with  $Z = 2$  for the formula unit, C<sub>21</sub>H<sub>22</sub>Cl<sub>4</sub>NPt. The final anisotropic full-matrix least-squares refinement on  $F^2$  with 255 variables converged at  $R1 = 2.20\%$ , for the observed data and  $wR2 = 12.64\%$  for all data. The goodness-of-fit was 1.097. The largest peak in the final difference electron density synthesis was 1.366 e<sup>-</sup>/Å<sup>3</sup> and the largest hole was -3.017 e<sup>-</sup>/Å<sup>3</sup> with an RMS deviation of 0.472 e<sup>-</sup>/Å<sup>3</sup>. On the basis of the final model, the calculated density was 1.927 g/cm<sup>3</sup> and  $F(000)$ , 632 e<sup>-</sup>.

**Table SM1. Sample and crystal data for complex 2.**

|                             |                                                     |                            |
|-----------------------------|-----------------------------------------------------|----------------------------|
| <b>Chemical formula</b>     | C <sub>21</sub> H <sub>24</sub> Cl <sub>4</sub> NPt |                            |
| <b>Formula weight</b>       | 656.26                                              |                            |
| <b>Temperature</b>          | 100(2) K                                            |                            |
| <b>Wavelength</b>           | 0.71073 Å                                           |                            |
| <b>Crystal size</b>         | 0.10 x 0.19 x 0.22 mm                               |                            |
| <b>Crystal habit</b>        | clear yellow prismatic                              |                            |
| <b>Crystal system</b>       | triclinic                                           |                            |
| <b>Space group</b>          | P -1                                                |                            |
| <b>Unit cell dimensions</b> | $a = 9.0349(8)$ Å                                   | $\alpha = 72.771(5)^\circ$ |
|                             | $b = 9.8658(9)$ Å                                   | $\beta = 75.680(4)^\circ$  |
|                             | $c = 14.1981(13)$ Å                                 | $\gamma = 71.733(4)^\circ$ |
| <b>Volume</b>               | 1131.09(18) Å <sup>3</sup>                          |                            |



**E) Supplementary information of the pBR322 binding studies and conditions.**

The DNA binding studies were done in a total volumen of 20 $\mu$ l. The DNA alicuots containing 8mL of DNA-pBR322 (10ng/mL stock) in 10mM Tris-HCl (pH 7.6) and 1mM EDTA were incubated with the platinum compounds at several  $r_i$  values (0.001 a 0.5) using the corresponding amount of platinum from either stock solution 5 $\mu$ M or 50  $\mu$ M. The samples were incubated at 37° for 24 h, after which time 2 $\mu$ L of a loading dye containing 50% glycerol, 0.25% bromophenol blue and 0.25% Xylenecyanol was added. The total of the sample (20 $\mu$ L) was loaded in the wells of a 0.8% agarose gel. Electrophoresis was carried out for a period of 2.5h approximately at 50V. After electrophoresis the gel was immersed in 800mL of Millipore water containing 64 $\mu$ L from a 10mg/mL stock solution of ethidium bromide for 30 m. to stain the DNA.

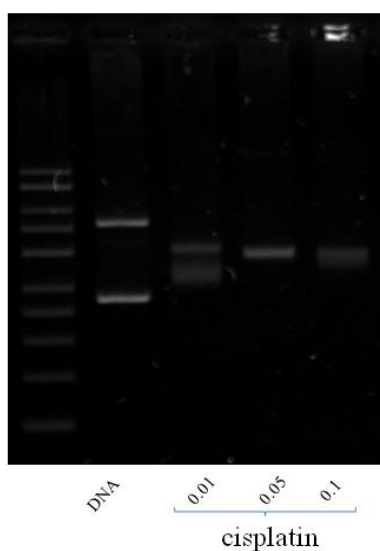

Figure SM2. Agarose gel electrophoresis of pBR322 plasmid treated with the cisplatin. Lane 1: Marker, lane 2: DNA of control plasmid. Plasmid DNA incubated at  $r_i = 0.01$  to 0,2, with cisplatin (lanes 3 to 6). oc = open circular DNA form; ccc =covalently closed circular DNA form



## **F) supplementary information of the reaction of complex 1 and GSH**

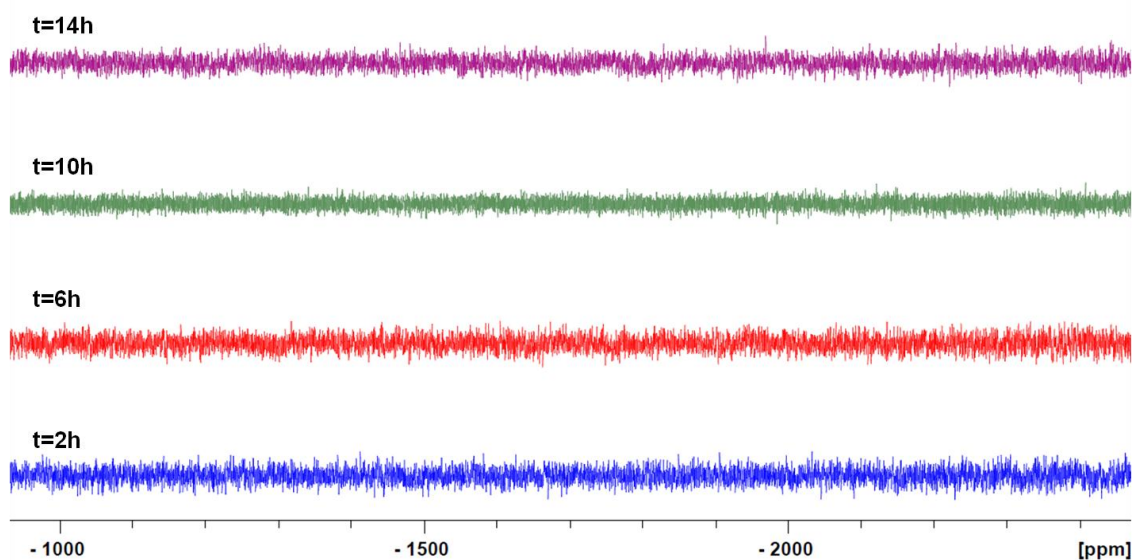

Figure SM3.  $^{195}\text{Pt}$  NMR spectra in the area of Pt(IV) for complex **1** with GSH (ratio 1:2) in DMSO recorded from 2h to 14h.

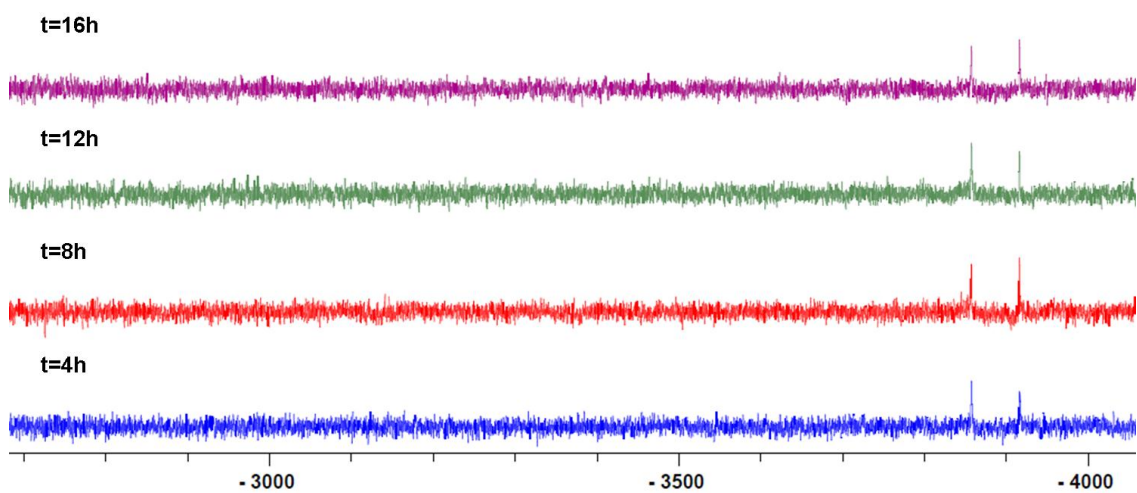

Figure SM4.  $^{195}\text{Pt}$  NMR spectra in the area of Pt(II) for complex **1** with GSH (ratio 1:2) in DMSO recorded from 2h to 16h.
